# Supplementary material for: Lightweight and conductive carbon black/chlorinated poly(propylene carbonate) foams with a remarkable negative temperature coefficient effect of resistance for temperature sensor applications
Source: Royal Society of Chemistry journal article supplement (doi:10.1039/c8tc02123f), 2018-01-01
Supplement: c8tc02123f1.pdf [file c8tc02123f1.pdf]

**Electronic Supplementary Information (ESI) for**  
**Lightweight and conductive carbon black/chlorinated poly(propylene carbonate) foams with remarkable negative temperature coefficient effect of resistance for temperature sensor applications**

Xihua Cui<sup>a, b</sup>, Jianwen Chen<sup>a, b</sup>, Yutian Zhu <sup>\*a</sup> and Wei Jiang<sup>\*a</sup>

<sup>a</sup> State Key Laboratory of Polymer Physics and Chemistry, Changchun Institute of Applied Chemistry, Chinese Academy of Sciences, Changchun 130022, P. R. China

<sup>b</sup> University of Science and Technology of China, Hefei 230026, P. R. China

**Corresponding Authors**

\*E-mail addresses: ytzhu@ciac.ac.cn (Y.Z.); wjiang@ciac.ac.cn (W.J.)

**Table S1** Formulations of the mixed compounds of CPPC before foaming

| composites | CPPC<br>(wt%) | CB<br>(wt%) | AC<br>(wt%) | ZnO<br>(wt%) | DCP<br>(wt%) | TAIC<br>(wt%) |
|------------|---------------|-------------|-------------|--------------|--------------|---------------|
| a-1        | 95.6          | 0.0         | 4.0         | 0.4          | 0.0          | 0.0           |
| a-2        | 94.6          | 1.0         | 4.0         | 0.4          | 0.0          | 0.0           |
| a-3        | 94.1          | 1.5         | 4.0         | 0.4          | 0.0          | 0.0           |
| a-4        | 93.6          | 2.0         | 4.0         | 0.4          | 0.0          | 0.0           |
| a-5        | 93.1          | 2.5         | 4.0         | 0.4          | 0.0          | 0.0           |
| a-6        | 92.6          | 3.0         | 4.0         | 0.4          | 0.0          | 0.0           |
| a-7        | 92.1          | 3.5         | 4.0         | 0.4          | 0.0          | 0.0           |
| a-8        | 91.6          | 4.0         | 4.0         | 0.4          | 0.0          | 0.0           |
| a-9        | 90.6          | 5.0         | 4.0         | 0.4          | 0.0          | 0.0           |
| a-10       | 89.6          | 6.0         | 4.0         | 0.4          | 0.0          | 0.0           |
| a-11       | 88.6          | 7.0         | 4.0         | 0.4          | 0.0          | 0.0           |
| b-1        | 91.6          | 0.0         | 4.0         | 0.4          | 2.0          | 2.0           |
| b-2        | 90.6          | 1.0         | 4.0         | 0.4          | 2.0          | 2.0           |
| b-3        | 90.1          | 1.5         | 4.0         | 0.4          | 2.0          | 2.0           |
| b-4        | 89.6          | 2.0         | 4.0         | 0.4          | 2.0          | 2.0           |
| b-5        | 89.1          | 2.5         | 4.0         | 0.4          | 2.0          | 2.0           |
| b-6        | 88.6          | 3.0         | 4.0         | 0.4          | 2.0          | 2.0           |
| b-7        | 88.1          | 3.5         | 4.0         | 0.4          | 2.0          | 2.0           |
| b-8        | 87.6          | 4.0         | 4.0         | 0.4          | 2.0          | 2.0           |
| b-9        | 86.6          | 5.0         | 4.0         | 0.4          | 2.0          | 2.0           |

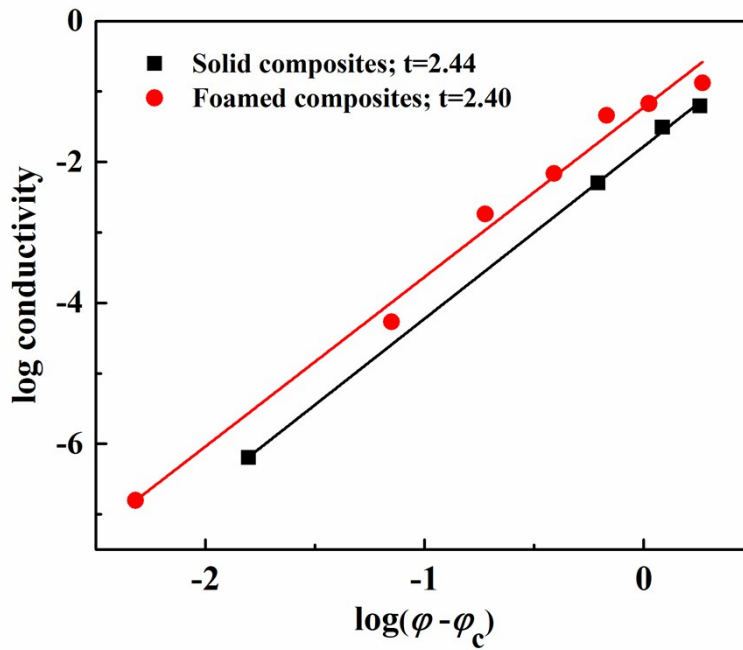

**Fig. S1** Linear fits of log conductivity vs.  $\log(\varphi - \varphi_c)$  for solid CB/CPPC composites and foamed CB/CPPC composites.

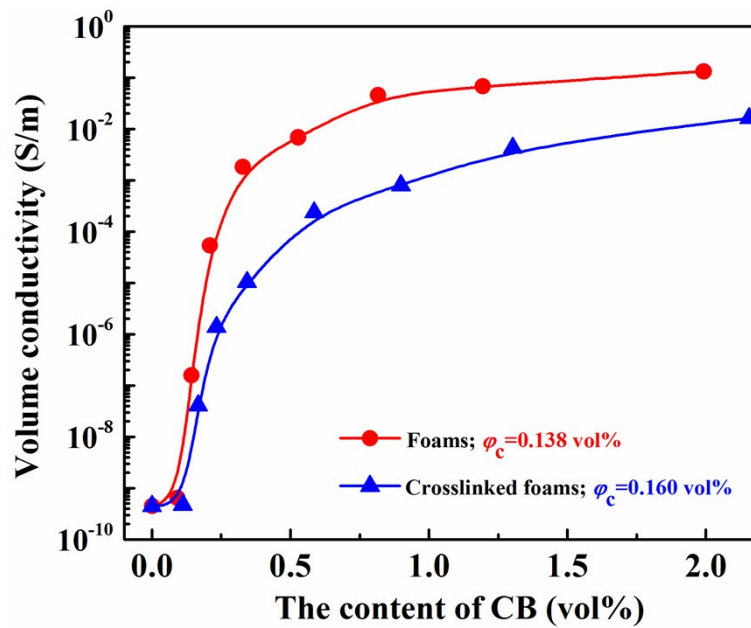

**Fig. S2** The volume conductivity of CB/CPPC foams and crosslinked foams as a function of the content of CB (vol%).

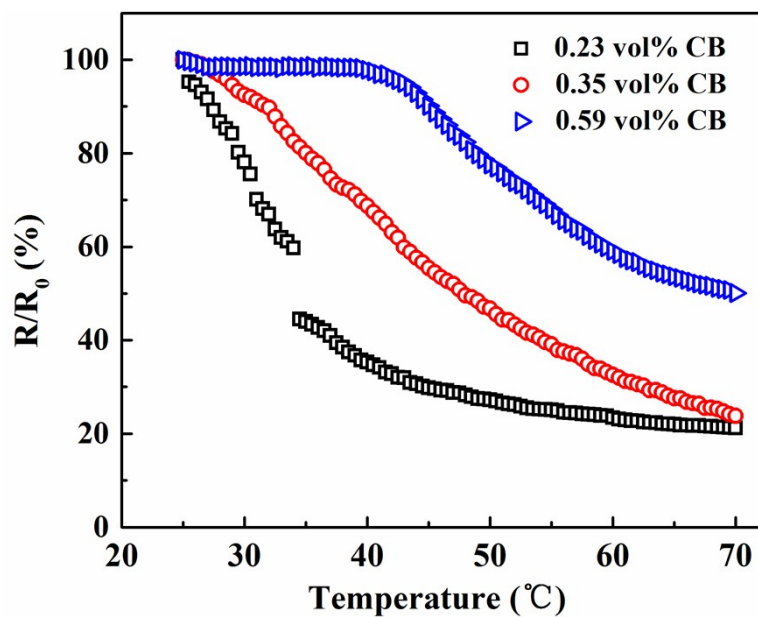

**Fig. S3** The normalized resistance ( $R/R_0$ ) as a function of temperature from 25 °C to 70 °C for crosslinked CB/CPPC foams with CB content of 0.23 vol%, 0.35 vol% and 0.59 vol%.

#### Description of Supporting Information Video

**Video S1** The crosslinked CB/CPPC foam (0.35 vol% CB) was connected with a LED lamp in a 6 V circuit. The foam sample was put in air at room temperature at first and then placed in an oven at 60 °C. Finally, the sample was taken out from the oven and put in air at room temperature again. The video recorded the change of lamp's brightness.
